# Supplementary material for: Utilizing 2D metal halide perovskite thin films as highly tuneable surfaces for orientation control of energetic materials
Source: Royal Society of Chemistry journal article supplement (doi:10.1039/d4re00206g), 2024-01-01
Supplement: d4re00206g1.pdf [file d4re00206g1.pdf]

## SUPPORTING INFORMATION

Utilizing 2D metal halide perovskite thin films as highly tunable surfaces for crystallographic orientation control of energetic materials

*Natalie Smith-Papin<sup>a</sup>, Meagan Phister<sup>a</sup>, Ashley Conley<sup>a</sup>, Nathan Swami<sup>b</sup>, Zbigniew Dreger<sup>b</sup>, Gaurav Giri<sup>a\*</sup>*

<sup>a</sup> Department of Chemical Engineering, University of Virginia, Charlottesville, Virginia, 22904, United States

<sup>b</sup> Department of Electrical and Computer Engineering, University of Virginia, Charlottesville, Virginia, 22904, USA.

<sup>c</sup> RDT&E Department, Naval Surface Warfare Center Indian Head Division, Indian Head, Maryland 20640, United States

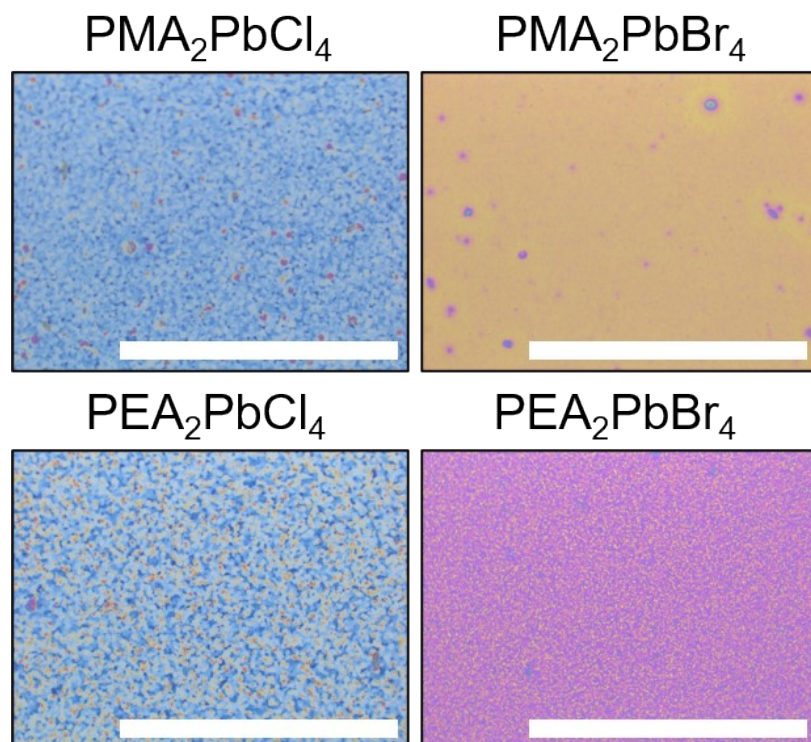

**SI Figure 1:** Optical images of spincoated perovskite films. Scale bar = 200 μm.

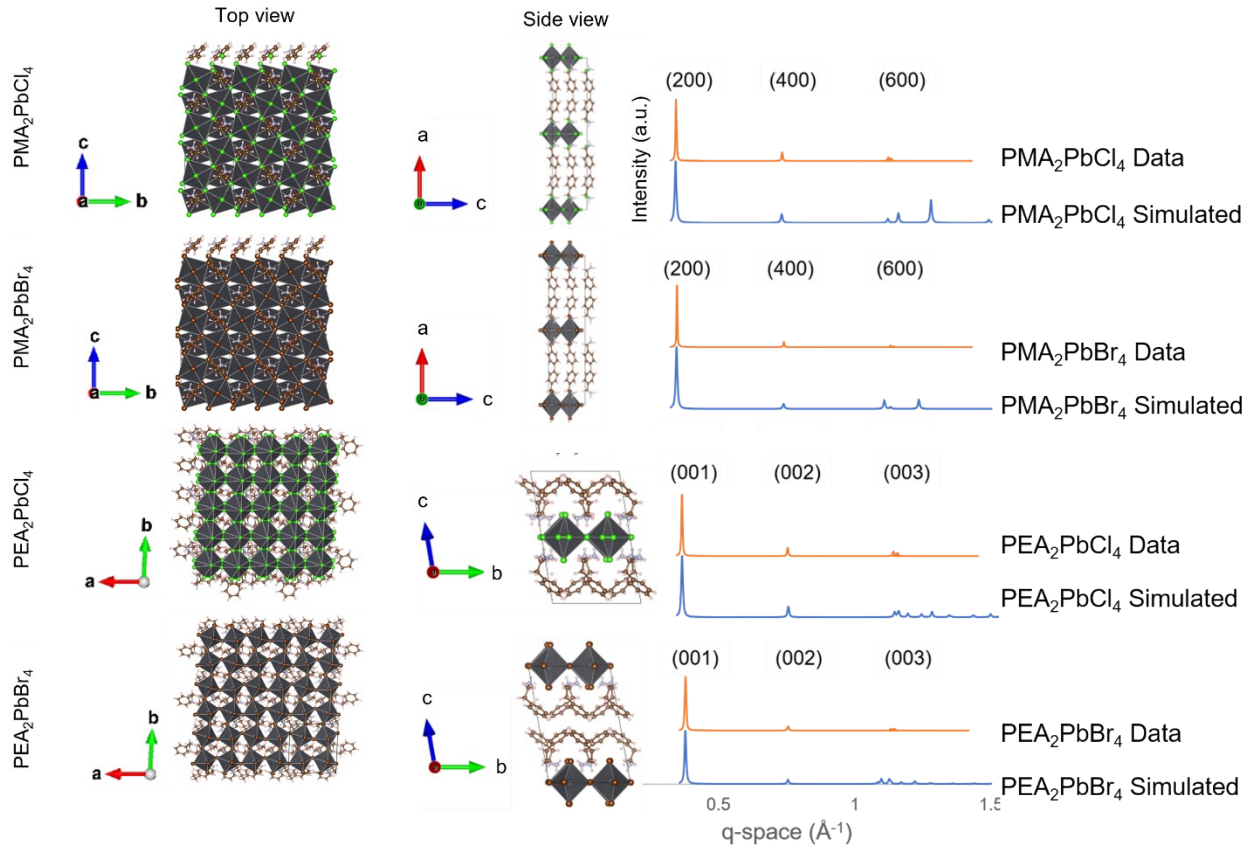

**SI Figure 2:** Unit cells of  $\text{PMA}_2\text{PbCl}_4$ ,  $\text{PMA}_2\text{PbBr}_4$ ,  $\text{PEA}_2\text{PbCl}_4$ , and  $\text{PEA}_2\text{PbBr}_4$  and their respective diffraction patterns compared to simulated patterns [1], [2], [3], [4]

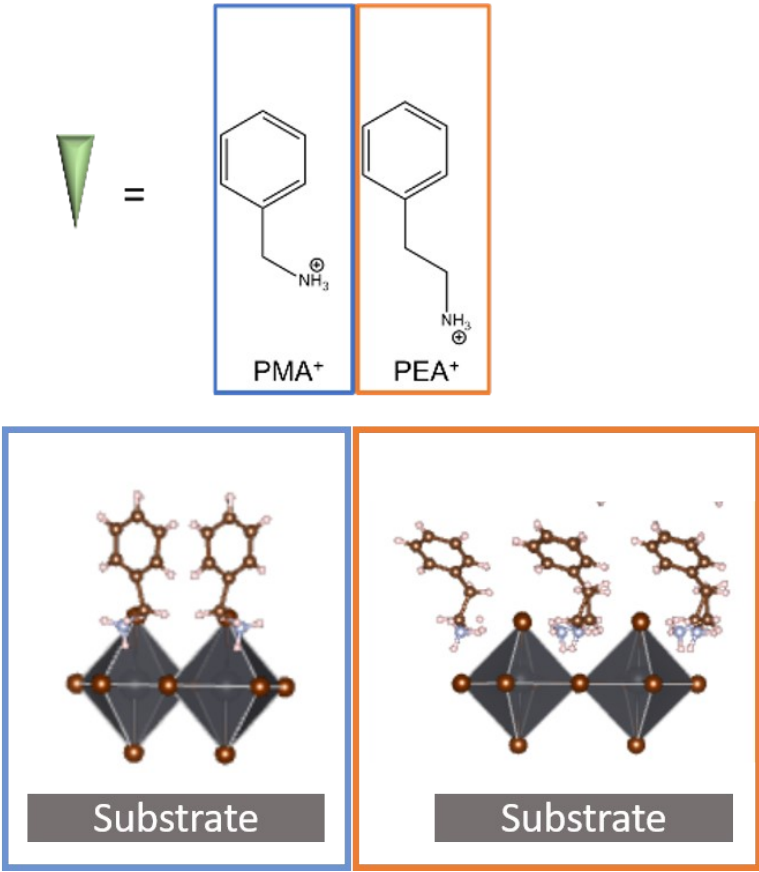

**SI Figure 3:** Relative orientation of benzene rings in PMA-based vs. PEA-based perovskite thin films.

**SI Table 1:** Calculations of ligand density for perovskite surfaces of interest. Bolded values indicate dimensions used to calculate periodic unit cell present at the interface of each perovskite.

| Perovskite                         | CCDC<br>Deposition<br>ID | a               | b               | c              | Area<br>(Å <sup>2</sup> ) | # of<br>ligands | Ligand<br>density<br>(ligand/Å <sup>2</sup> ) |
|------------------------------------|--------------------------|-----------------|-----------------|----------------|---------------------------|-----------------|-----------------------------------------------|
| PMA <sub>2</sub> PbCl <sub>4</sub> | 1042742                  | 33.63500        | <b>7.81700</b>  | <b>7.73700</b> | 60.4801                   | 2               | 0.03307                                       |
| PMA <sub>2</sub> PbBr <sub>4</sub> | 1542460                  | 33.35290        | <b>8.14660</b>  | <b>8.12320</b> | 66.1765                   | 2               | 0.03022                                       |
| PEA <sub>2</sub> PbCl <sub>4</sub> | 1498513                  | <b>11.11520</b> | <b>11.20480</b> | 17.59090       | 124.544                   | 4               | 0.03212                                       |
| PEA <sub>2</sub> PbBr <sub>4</sub> | 754084                   | <b>11.61500</b> | <b>11.62750</b> | 17.57510       | 135.053                   | 4               | 0.02962                                       |

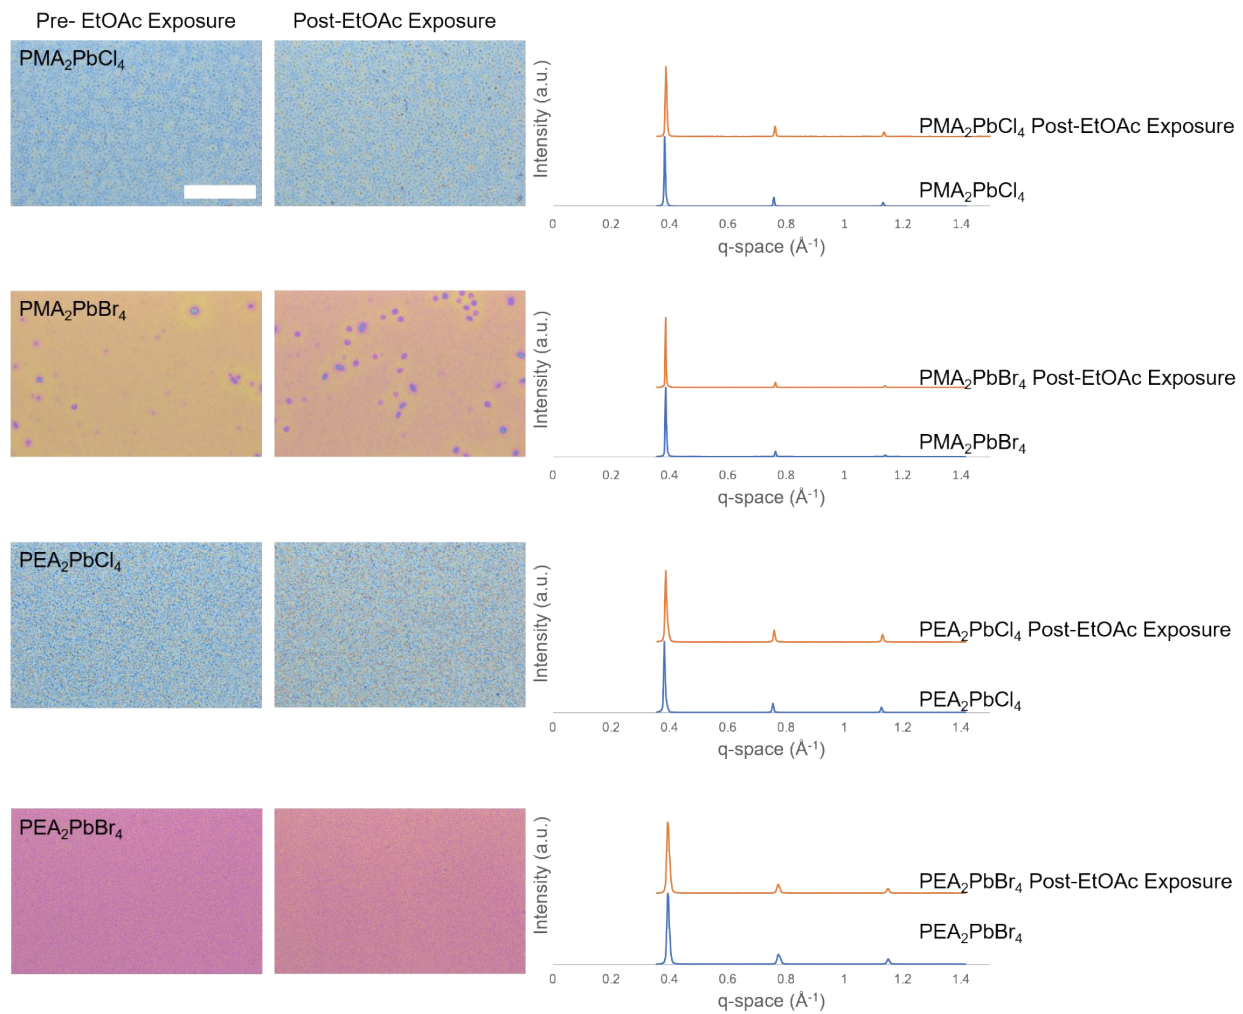

**SI Figure 4:** Optical images and x-ray diffraction patterns for perovskite films prior to and after exposure to ethyl acetate. Scale bar is the same for all images = 200  $\mu\text{m}$ .

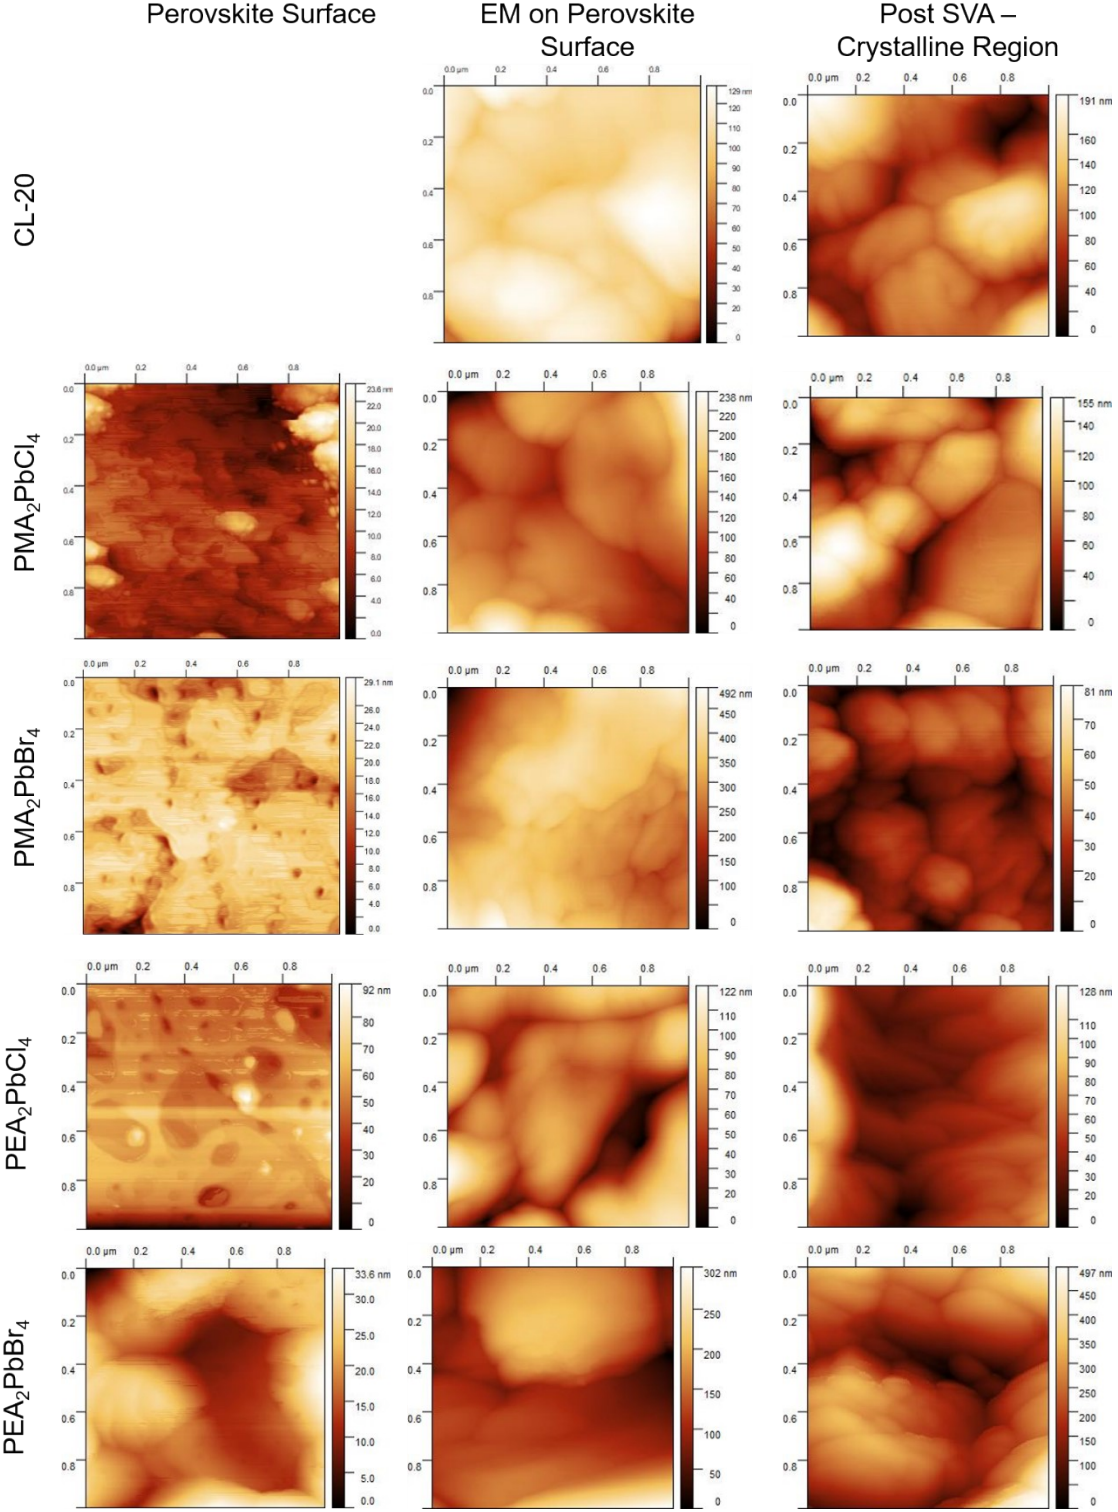

**SI Figure 5:** Atomic force microscopy of 2D MHP surfaces (left column), 2D MHP/CL-20 bilayer (middle column), and 2D MHP/CL-20 bilayer film after SVA (right column).

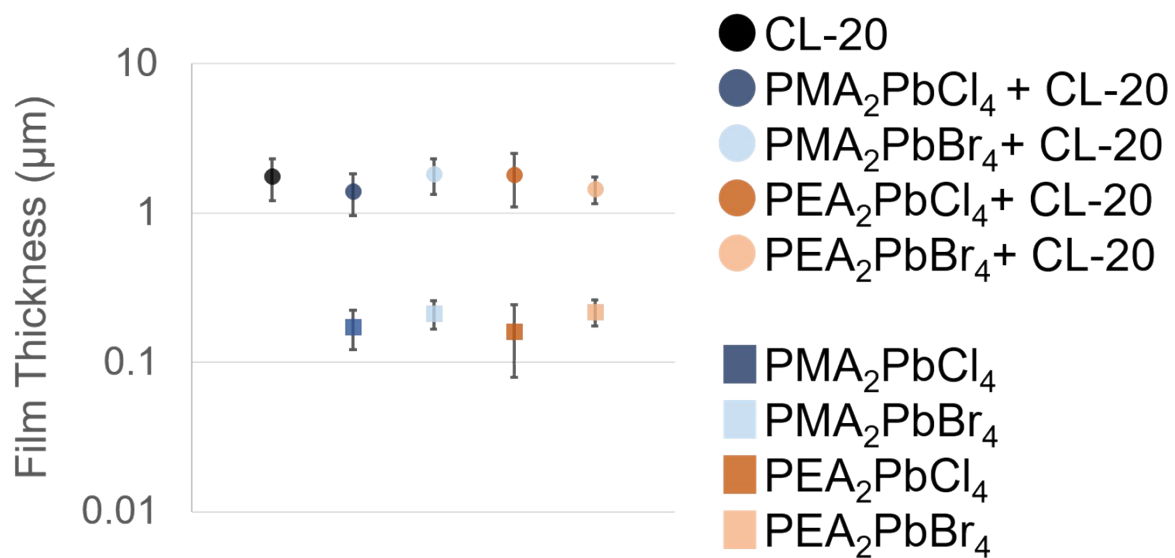

**SI Figure 6:** Film thickness measurements of 2D MHP (squares) and 2D MHP/CL-20 bilayer films (circles).



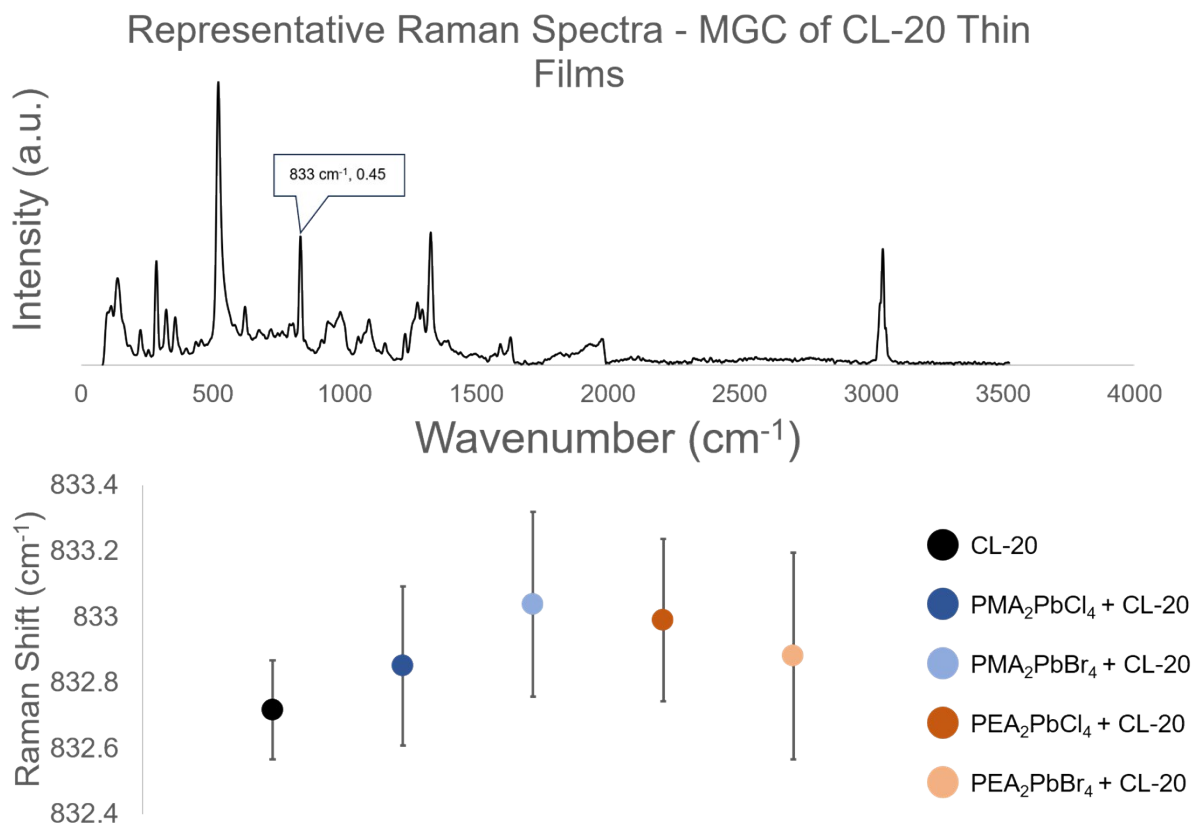

**SI Figure 7:** Representative Raman spectrum for CL-20 with peak at  $\sim 833$  cm<sup>-1</sup> highlighted as this indicates crystallization of the  $\beta$ -CL-20 polymorph. Average peak location of perovskite/CL-20 bilayer films shows no significant peak shift due to interfacial interactions.

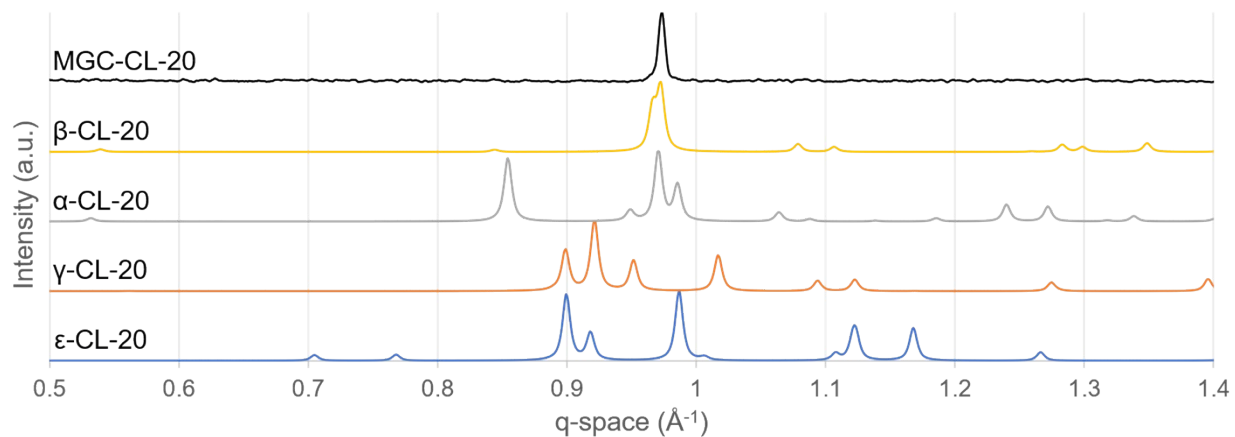

**SI Figure 8:** Representative XRD spectra of MGC-CL-20 relative to simulated patterns of three polymorphic ( $\beta$ ,  $\gamma$ ,  $\epsilon$ ) and one hydrate ( $\alpha$ ) structure of CL-20.[5], [6], [7] Confirmation of  $\beta$ -CL-20 crystallization with high degree of orientation in the MGC films.

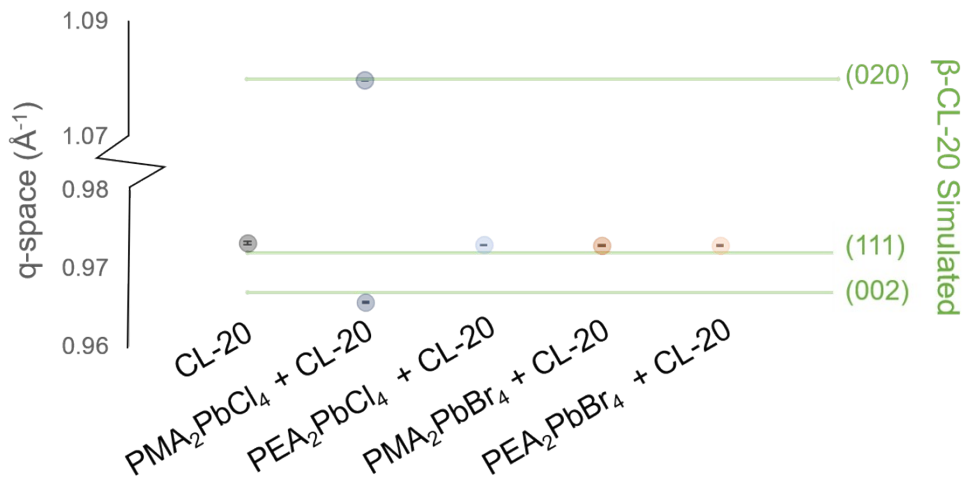

**SI Figure 9:** Average CL-20 peak location is tabulated for each bilayer pair relative to control MGC-CL-20 (black). Sample size = 3.

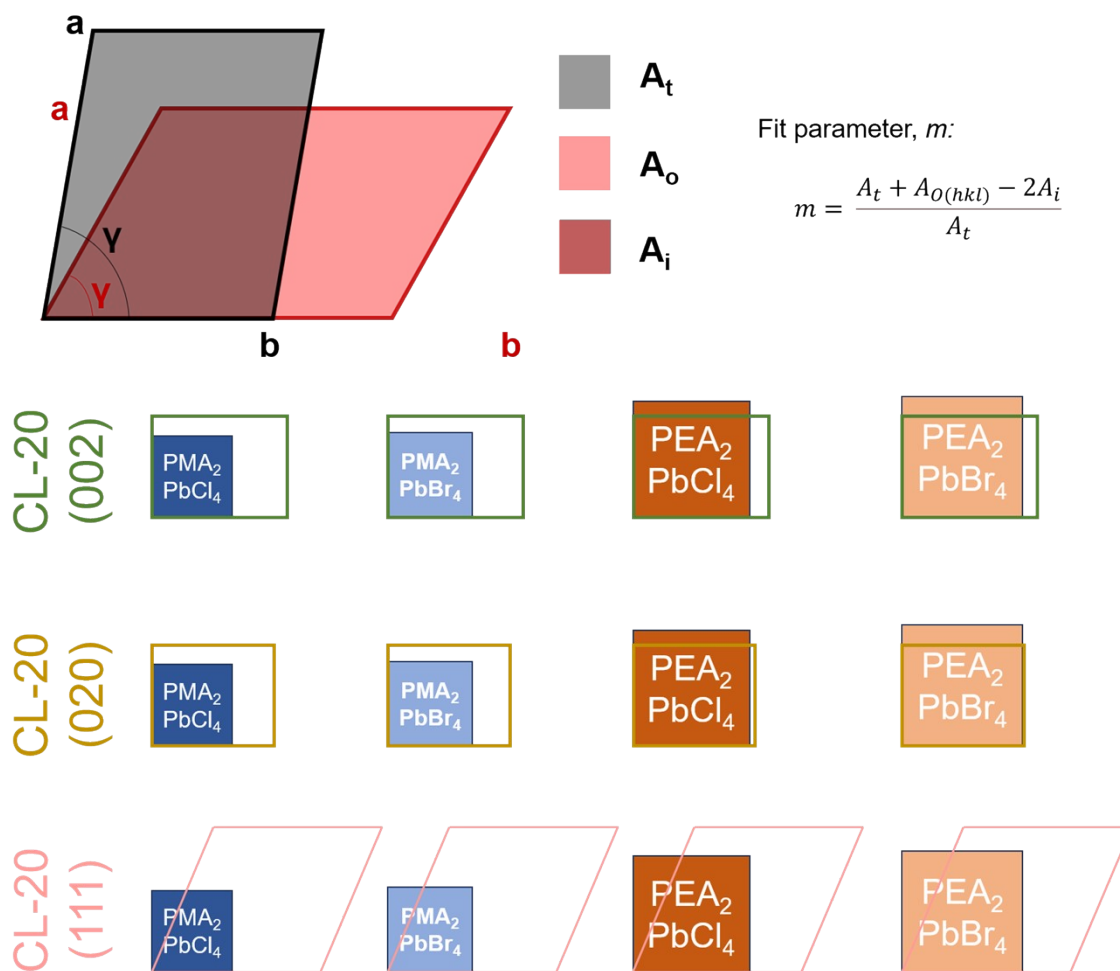

**SI Figure 10:** Fit parameter definition and calculation. Overlay of interfacial unit cells of (1x1) unit cell perovskite surfaces with crystallographic planes ((002), (020), and (111)) of  $\beta$ -CL-20. Adapted from [8].

MGC Films in SVA chamber during onset of dissolution

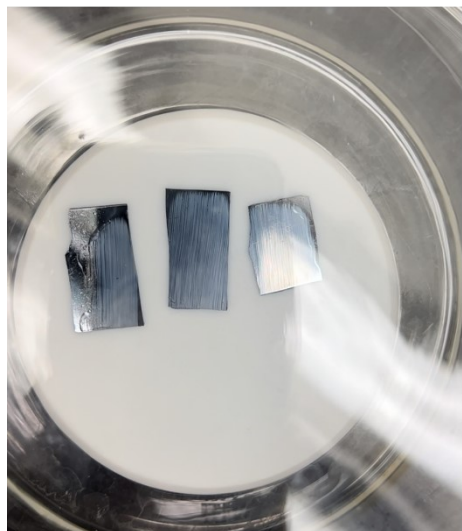

Films post SVA – accumulation of crystals in smaller area

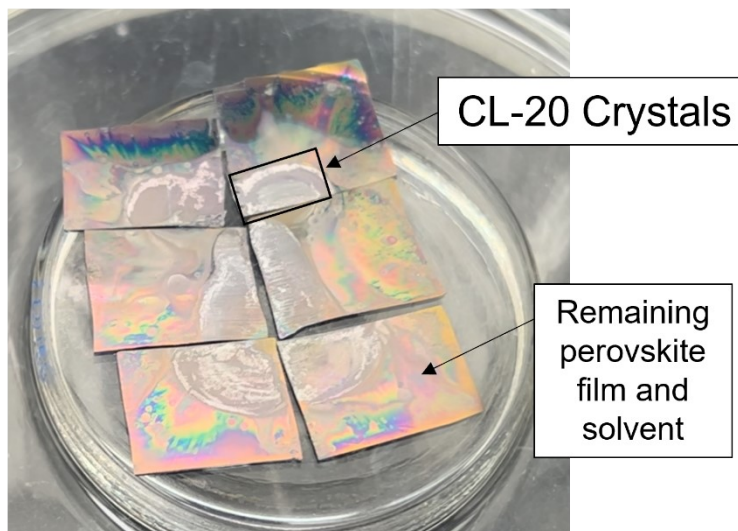

**SI Figure 11:** Accumulation of CL-20 crystals during recrystallization after SVA. CL-20 crystals indicated in black box. Colorful area contains remaining perovskite film and residual solvent.

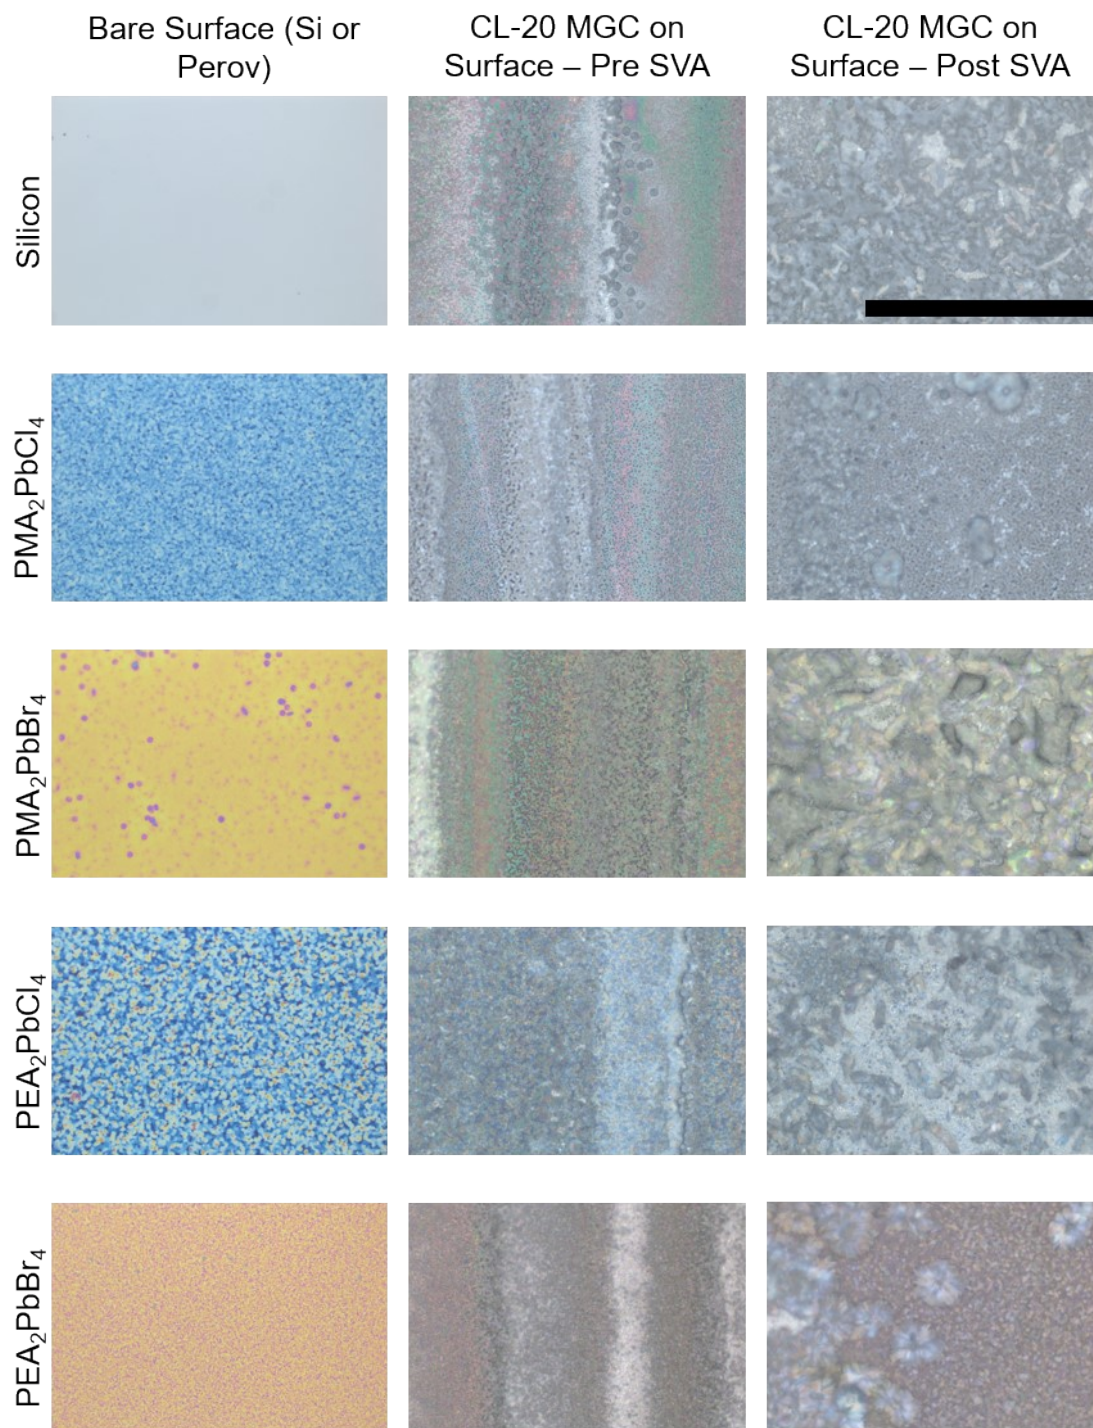

**SI Figure 12:** Optical images of perovskite surfaces (column 1), perovskite + CL-20 bilayer films after MGC (column 2), and perovskite + CL-20 bilayer films after MGC and SVA (column 3). Scale bar = 200  $\mu\text{m}$ .

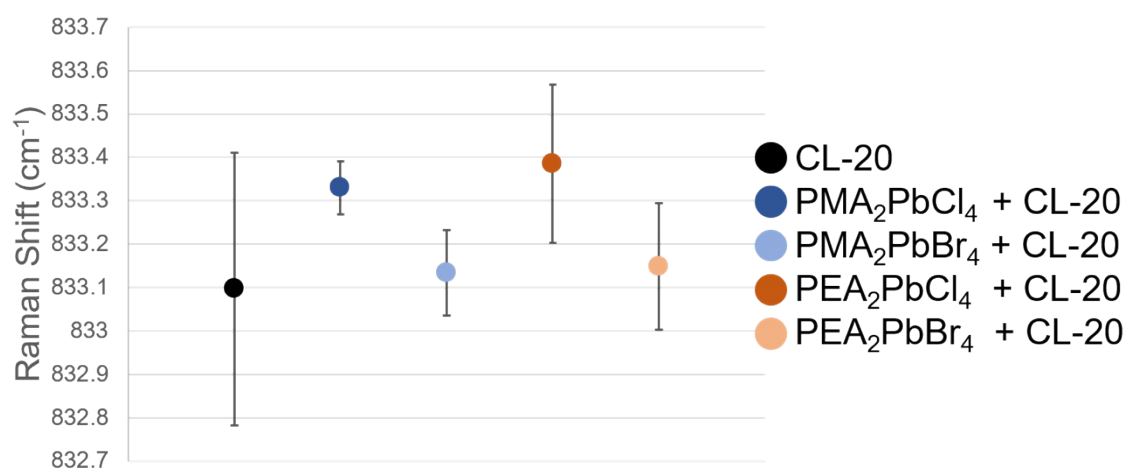

**SI Figure 13:** Average Raman shift of the 833 cm<sup>-1</sup> peak (associated with  $\beta$ -CL-20) after SVA in EtOAc. (n=3)

## Appendix References:

- [1] W. Q. Liao *et al.*, "A lead-halide perovskite molecular ferroelectric semiconductor," *Nature Communications* 2015 6:1, vol. 6, no. 1, pp. 1–7, May 2015, doi: 10.1038/ncomms8338.
- [2] K. Du *et al.*, "Two-Dimensional Lead(II) Halide-Based Hybrid Perovskites Templated by Acene Alkylamines: Crystal Structures, Optical Properties, and Piezoelectricity," *Inorg Chem*, vol. 56, no. 15, pp. 9291–9302, Aug. 2017, doi: 10.1021/ACS.INORGCHEM.7B01094.
- [3] K. Thirumal *et al.*, "Morphology-Independent Stable White-Light Emission from Self-Assembled Two-Dimensional Perovskites Driven by Strong Exciton–Phonon Coupling to the Organic Framework," *Chemistry of Materials*, vol. 29, no. 9, pp. 3947–3953, May 2017, doi: 10.1021/ACS.CHEMMATER.7B00073.
- [4] K. Shibuya, M. Koshimizu, F. Nishikido, H. Saito, and S. Kishimoto, "Poly[bis(phenethylammonium) [di-bromido-plumbate(II)]-di- $\mu$ -bromido]," *Acta Crystallogr Sect E Struct Rep Online*, vol. 65, no. 11, pp. m1323–m1324, Oct. 2009, doi: 10.1107/S160053680903712X/ZQ2004ISUP2.HKL.
- [5] A. T. Nielsen *et al.*, "Synthesis of polyazapolycyclic caged polynitramines," *Tetrahedron*, vol. 54, no. 39, pp. 11793–11812, Sep. 1998, doi: 10.1016/S0040-4020(98)83040-8.
- [6] Y. Yu, S. Jin, J. Zhu, L. Li, S. Chen, and Q. Shu, "Crystal structure of 2,4,6,8,10,12-hexanitro-2,4,6,8,10,12-hexaazatetracyclo[5·5·0·05·9·03·11]dodecane 1/3 hydrate, C<sub>6</sub>H<sub>8</sub>N<sub>12</sub>O<sub>13</sub>," *Zeitschrift für Kristallographie - New Crystal Structures*, vol. 231, no. 2, pp. 491–492, Jun. 2016, doi: 10.1515/NCRS-2015-0156/DOWNLOADASSET/SUPPL/NCRS-2015-0156\_SUPPL.CIF.
- [7] N. B. Bolotina, M. J. Hardie, R. L. Speer, and A. A. Pinkerton, "Energetic materials: Variable-temperature crystal structures of  $\gamma$ - and  $\epsilon$ -HNIW polymorphs," *J Appl Crystallogr*, vol. 37, no. 5, pp. 808–814, Oct. 2004, doi: 10.1107/S0021889804017832.
- [8] J. T. Dull *et al.*, "Thin-Film Organic Heteroepitaxy," *Advanced Materials*, p. 2302871, 2023, doi: 10.1002/ADMA.202302871.
